# Supplementary material
Source: Elsevier journal article supplement (https://www.sciencedirect.com/science/article/pii/S2341192917301841)

## DIFFICULT AIRWAY ALGORITHM

### 1. Assess the likelihood and clinical impact of basic management problems:

- Difficulty with patient cooperation or consent
- Difficult mask ventilation
- Difficult supraglottic airway placement
- Difficult laryngoscopy
- Difficult intubation
- Difficult surgical airway access

### 2. Actively pursue opportunities to deliver supplemental oxygen throughout the process of difficult airway management.

### 3. Consider the relative merits and feasibility of basic management choices:

- Awake intubation vs. intubation after induction of general anesthesia
- Non-invasive technique vs. invasive techniques for the initial approach to intubation
- Video-assisted laryngoscopy as an initial approach to intubation
- Preservation vs. ablation of spontaneous ventilation

### 4. Develop primary and alternative strategies:

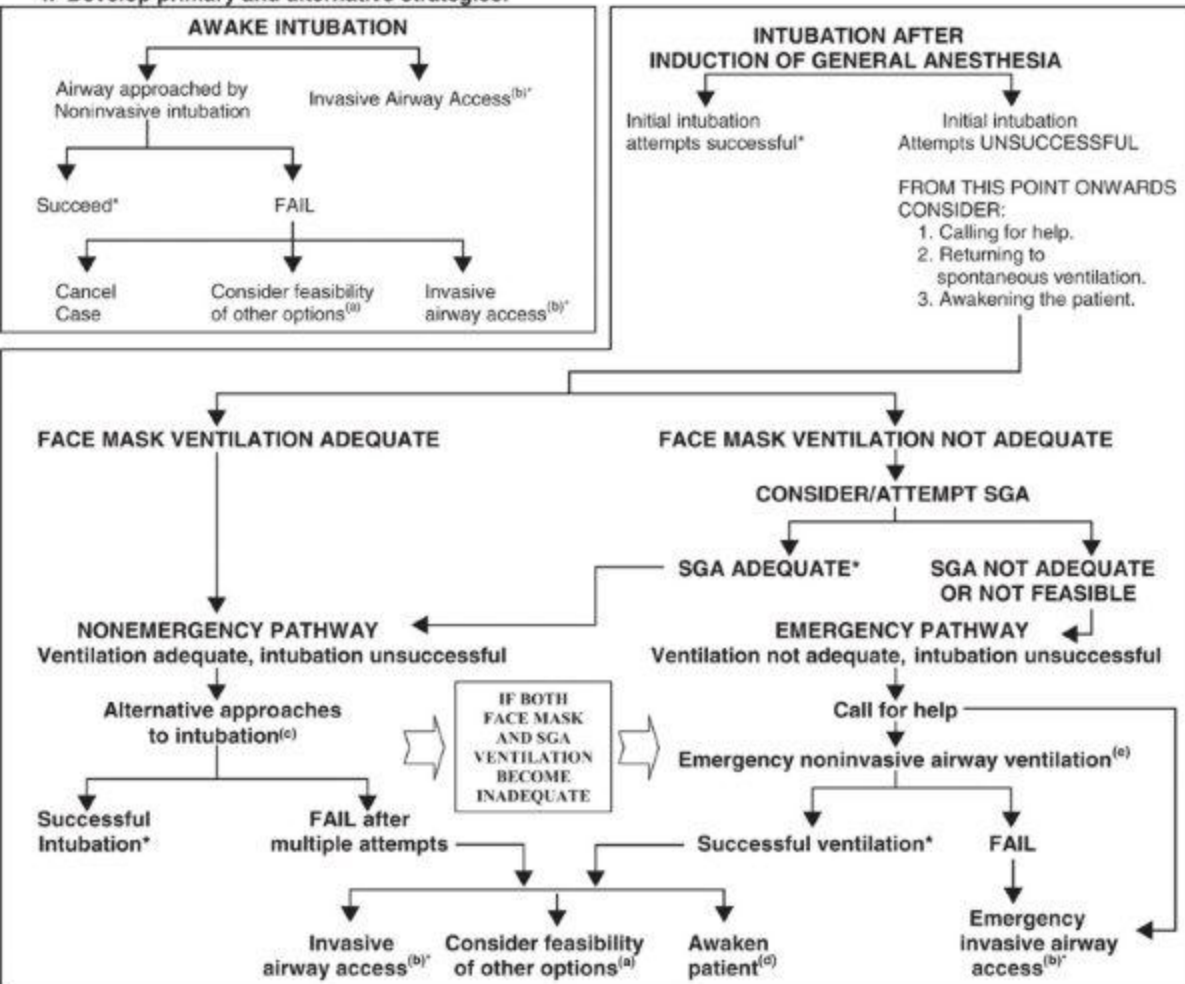

Supplement: mmc1 [file S2341192917301841:mmc1.pdf]
